# Supplementary material
Source: Research Square preprint supplement (doi:10.21203/rs.3.rs-10017558/v1)
Supplement: Supplementary file 1 [file 0d8710b91f52721ade9243ce.docx]

**A Ultrasensitive Immunoassay based on Weakly Charged AuNPs orientated Antibody for Triazophos Detection in Vegetables**

**Qinghuan Wua,b,1, Qijun Wangb,1, A.M. Abd El-Atyc, Xing Zhanga, Guangyang Liua, Hui Lid, Xinyan Liua, Lin Qina, Xiaodong Huanga,*, Donghui Xua,*, Ge Chena,***

*aInstitute of Vegetables and Flowers,* *Chinese Academy of Agricultural Sciences, State Key Laboratory of Vegetable Biobreeding, Key Laboratory of Vegetables Quality and Safety Control, Ministry of Agriculture and Rural Affairs of China, Ministry of Agriculture Vegetable Product Quality Safety Risk Assessment Laboratory, Beijing, 100081,* *P. R. China*

*bCollege of Horticulture and Landscape Architecture, Southwest University, Key Laboratory of Agricultural Biosafety and Green Production of Upper Yangtze River (Ministry of Education), Chongqing, 400715, P. R. China*

*cDepartment of Medical Pharmacology, Faculty of Medicine, Atatürk University, Erzurum, 25240, Turkey*

*dBeijing Yishi Biotech Co., Ltd., Beijing, 100081,* *P. R. China*

*1These authors contributed equally to this work.*

**Corresponding author. Email: chenge@caas.cn (G.C), xudonghui@caas.cn (D.X)*

**Synthesis of Cit-AuNPs**

One hundred milliliters of double-distilled water was placed in a 250 mL round-bottom flask and heated to boiling under continuous stirring. Then, 2.0 mL of a 1 % (*w/v*) chloroauric acid solution was added. When the mixture was allowed to vigorously boil again, 4.5 mL of a 1 % (*w/v*) trisodium citrate solution was rapidly introduced. The reaction was maintained under boiling conditions for an additional 10 minutes before heating ceased [1]. After cooling to room temperature, the solution was filtered through a 0.22 μm membrane filter and stored at 4 °C for future use.

**Preparation of Ab@Cit-AuNPs**

During the preparation of Ab@Cit-AuNPs, the pH of the Cit-AuNP solution was first adjusted to 8.5 using K2CO3 to prevent aggregation during incubation with the antibody. The labeling antibody was subsequently added to the solution at a final concentration of 6 μg/mL, followed by incubation at room temperature for 0.5 h. After centrifugation (10,000 rpm, 10 min, 4 °C), the resulting Ab@Cit-AuNPs were concentrated, resuspended in 0.01 M PBS, and then stored at 4 °C for subsequent characterization and chemical analysis.

The sensitivity of the assay was evaluated by calculating the rate of inhibition of antigen–antibody binding by the pesticide via the following formula:Inhibition rate (%) = [1 − (B/B₀)] × 100 %, where B₀and B represent the average absorbance in the absence and presence of the pesticide, respectively. To ensure reproducibility and reliability, each experiment was independently repeated three times.

**References**

1. Liu ZW, Hua QC, Wang J, et al (2020) A smartphone-based dual detection mode device integrated with two lateral flow immunoassays for multiplex mycotoxins in cereals. Biosens. Bioelectron. 158:112178. <https://doi.org/10.1016/j.bios.2020.112178>.
